# Supplementary material
Source: publisher site journal article supplement (https://www.spandidos-publications.com/1747/downloadSupplementary)
Supplement: Supplementary file 1 [file downloadSupplementary]

Figure S1. Time-dependent ROC curves for CXCR subunits in patients with pancreatic ductal adenocarcinoma. Time-dependent ROC curves for (A) overall survival and (B) disease-free survival. CXCR, C-X-C motif chemokine receptor; ROC, receiver operating characteristic; AUC, area under the curve.

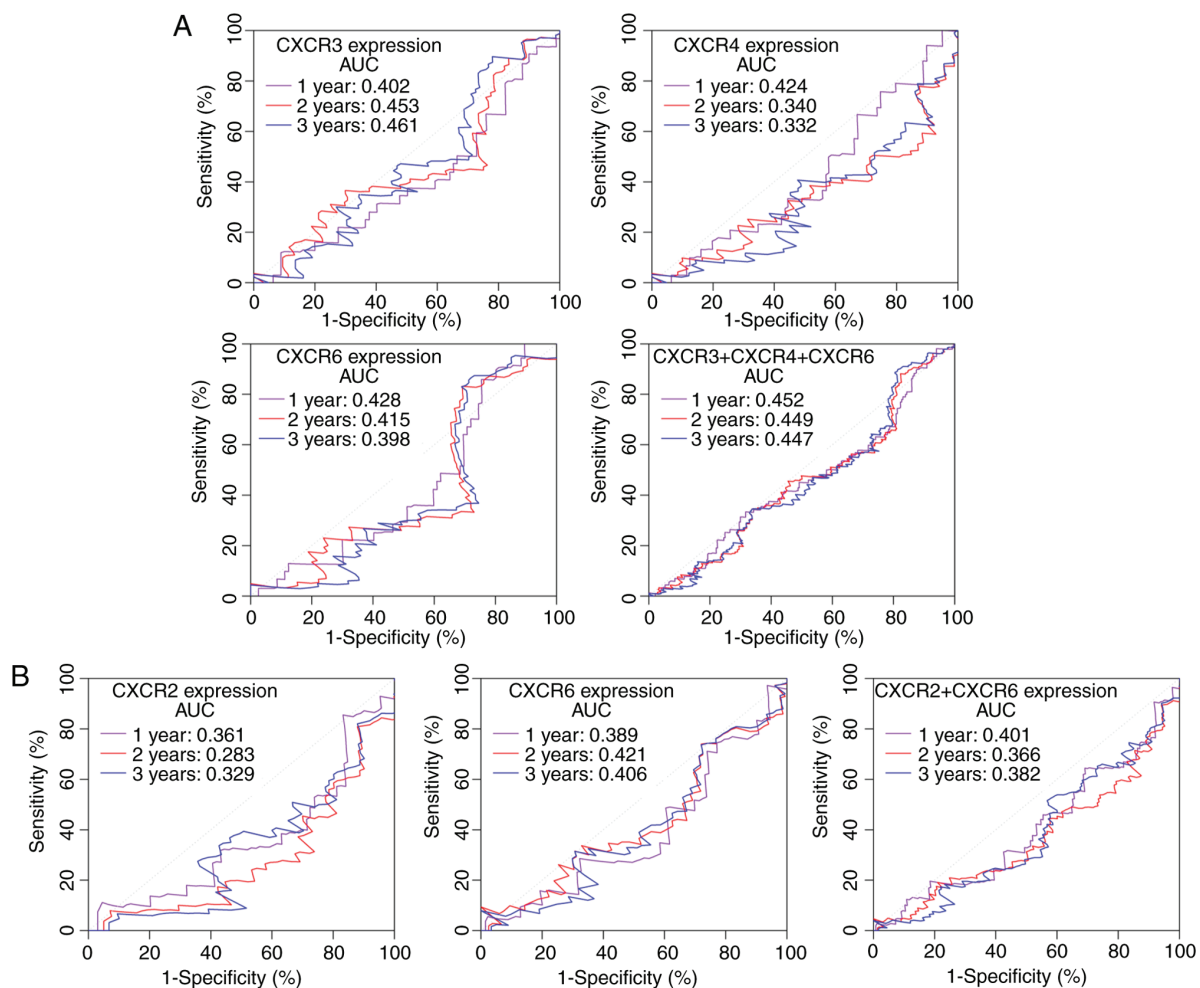

Figure S2. GSEA in patients with early-stage PDAC. GSEA reports of adhesion and differentiation of immune cells for high C-X-C motif chemokine receptor subunit expression levels using high- vs. low-risk groups. Enrichment plots for (A) regulation of adaptive immune response, (B) leukocyte cell to cell adhesion, (C) regulation of cell to cell adhesion, (D) lymphocyte differentiation and (E) T cell differentiation. These panels provide the genome-wide potential pathways and molecular mechanisms in patients with PDAC based on gene expression levels. NES, normalized enrichment score; GSEA, gene set enrichment analysis; PDAC, pancreatic ductal adenocarcinoma.

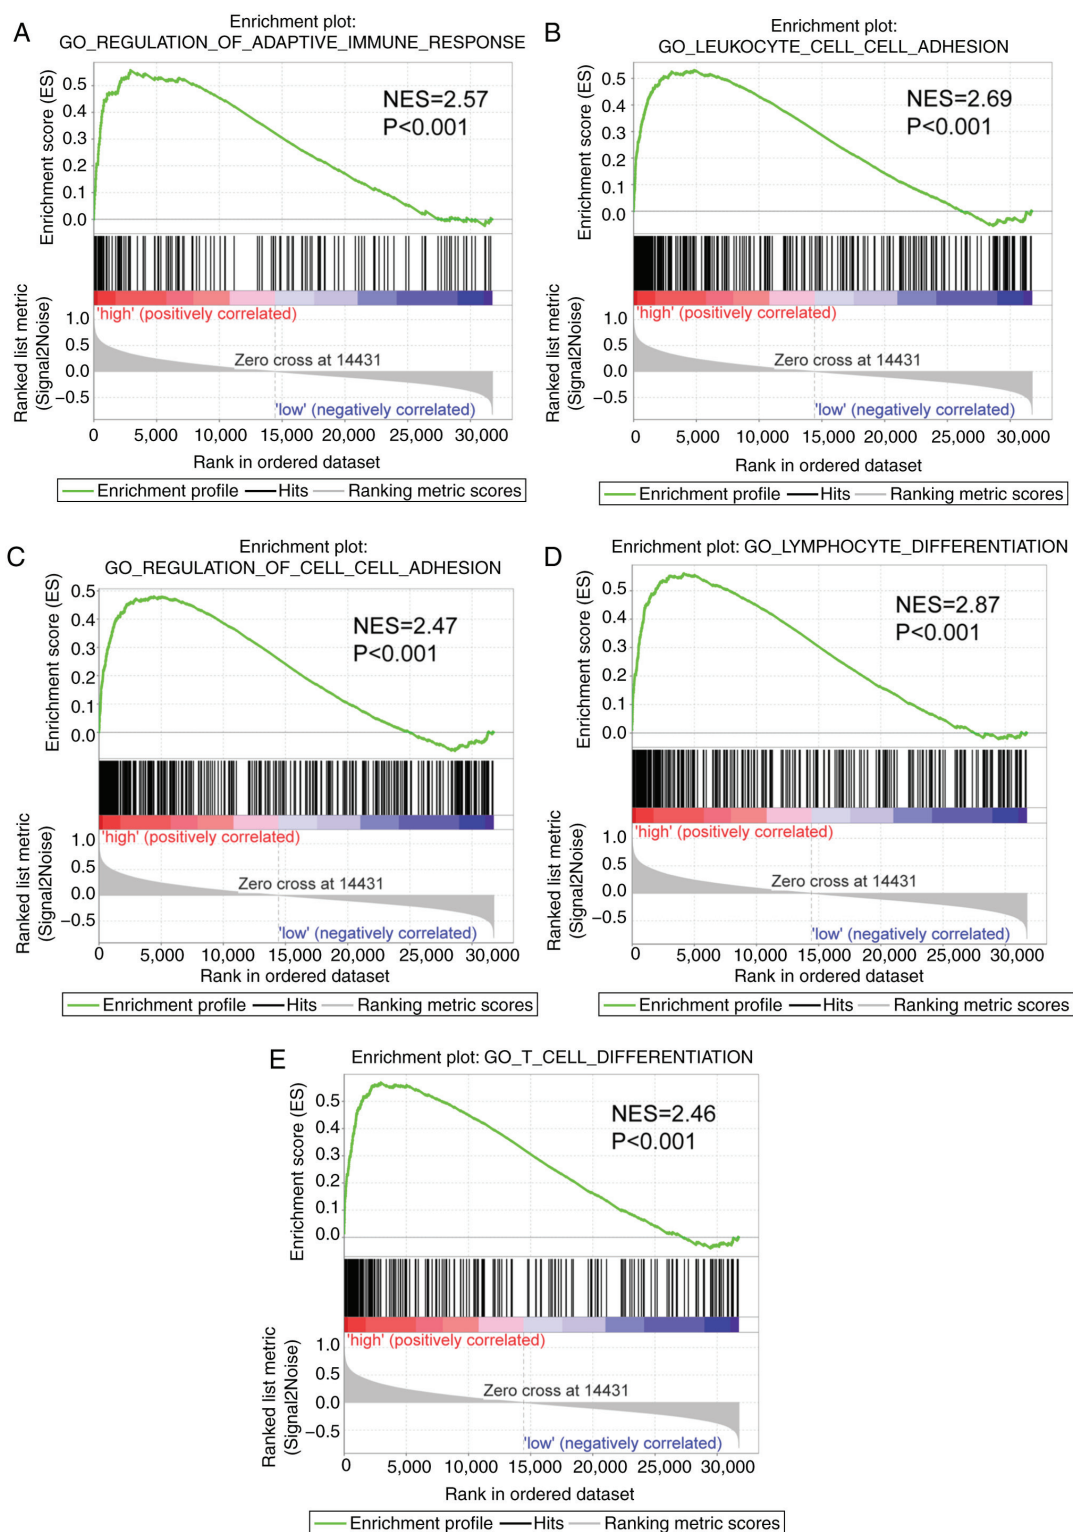

Figure S3. Comparisons of tumor infiltration levels among tumors with different SCNAs for CXCR2, CXCR3, CXCR4 and CXCR6. The infiltration level for each SCNA category defined by GISTIC 2.0 (deep deletion, arm-level deletion, arm-level gain and high amplification) was compared with the diploid/normal group using the two-sided Wilcoxon rank sum test with Bonferroni's correction. These figures provide the comparison of the abundance of immune infiltration among tumors with different SCNA category for given CXCR subunit groups. \* $P < 0.05$ , \*\* $P < 0.01$ , \*\*\* $P < 0.001$ . PAAD, pancreatic adenocarcinoma; CXCR, C-X-C motif chemokine receptor; SCNAs, somatic copy number alterations.

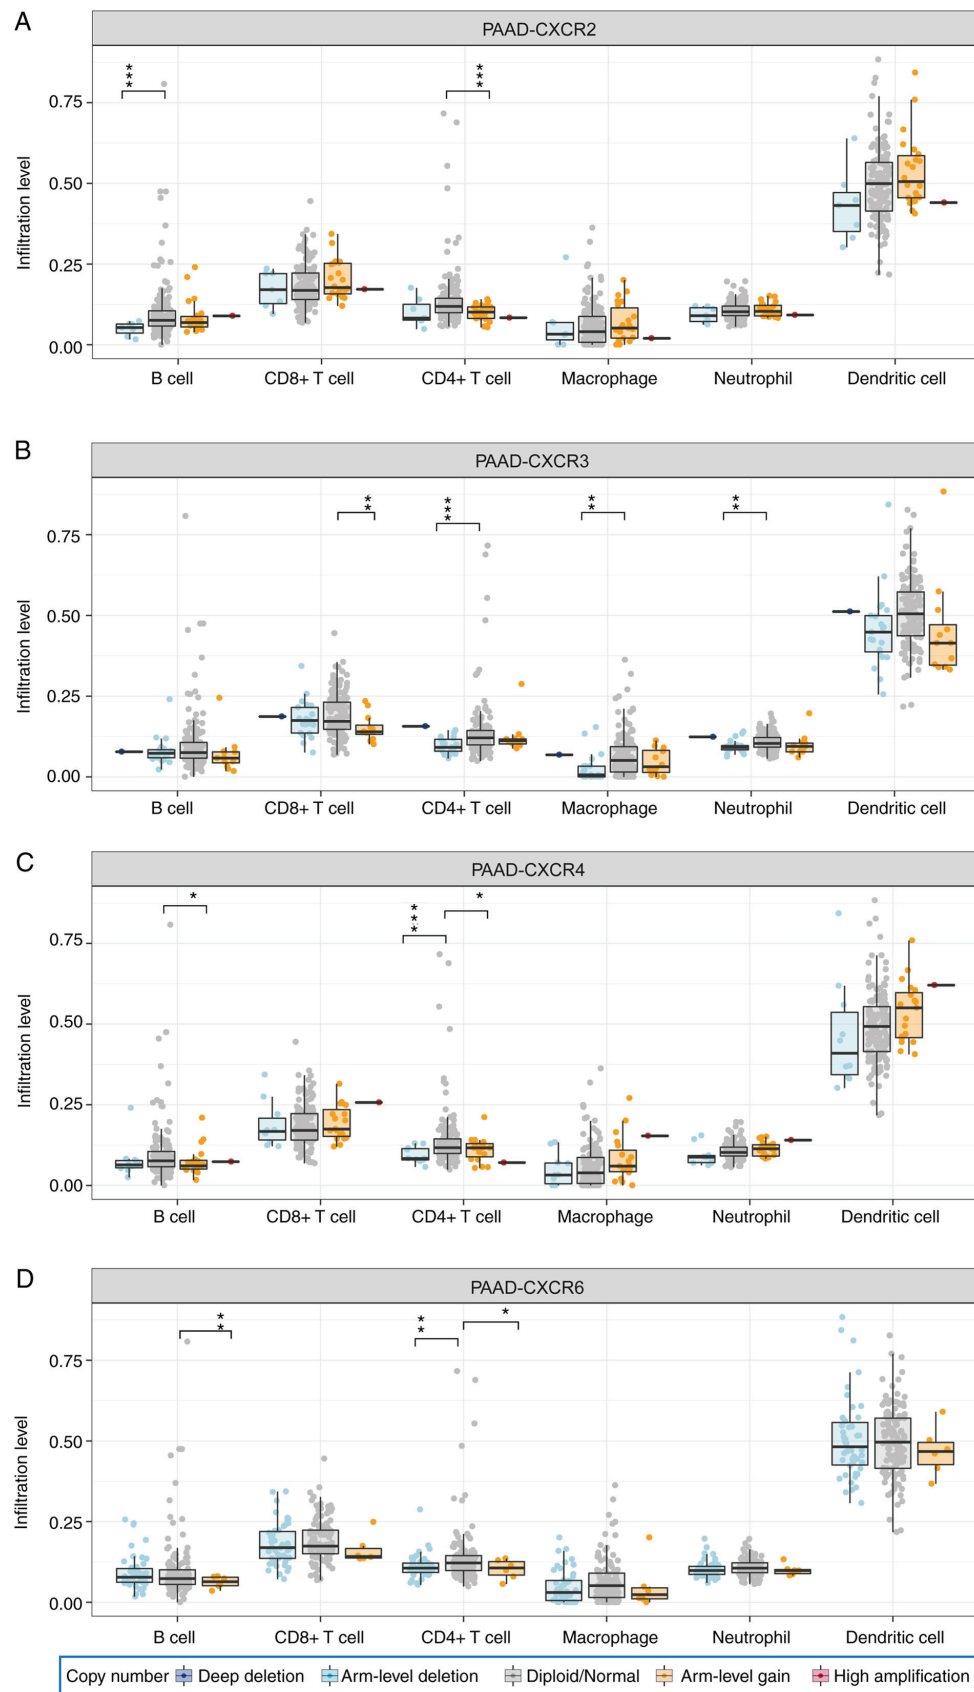

Table SI. Survival analysis of clinicopathological features in 112 patients with early-stage pancreatic ductal adenocarcinoma.

| Clinicopathological feature | Patients | MST, days | Log-rank P-value | HR (95% CI)      | MRT (days) | Log-rank P-value | HR (95% CI)       |
|-----------------------------|----------|-----------|------------------|------------------|------------|------------------|-------------------|
| Age, years                  |          |           |                  |                  |            |                  |                   |
| ≤60                         | 38       | 593       | 0.066            | Ref.             | 716        | 0.549            | Ref.              |
| >60                         | 74       | 485       |                  | 1.64 (0.96-2.78) | 581        |                  | 0.81 (0.42-1.60)  |
| Sex                         |          |           |                  |                  |            |                  |                   |
| Female                      | 53       | 511       | 0.523            | Ref.             | 831        | 0.971            | Ref.              |
| Male                        | 59       | 592       |                  | 0.86 (0.53-1.38) | 593        |                  | 0.99 (0.51-1.93)  |
| Alcohol addiction history   |          |           |                  |                  |            |                  |                   |
| No                          | 43       | 592       | 0.349            | Ref.             | 716        | 0.479            | Ref.              |
| Yes                         | 61       | 511       |                  | 1.28 (0.77-2.13) | 593        |                  | 1.29 (0.63-2.64)  |
| Pathological stage          |          |           |                  |                  |            |                  |                   |
| Stage I                     | 8        | 236       | 0.943            | Ref.             | NA         | 0.374            | Ref.              |
| Stage II                    | 104      | 518       |                  | 1.04 (0.38-2.87) | 620        |                  | 2.40 (0.33-17.61) |
| Pathological T stage        |          |           |                  |                  |            |                  |                   |
| T1/T2                       | 14       | 498       | 0.466            | Ref.             | NA         | 0.249            | Ref.              |
| T3                          | 98       | 518       |                  | 1.34 (0.61-2.95) | 593        |                  | 1.99 (0.60-6.60)  |
| Pathological N stage        |          |           |                  |                  |            |                  |                   |
| N0                          | 21       | 634       | 0.091            | Ref.             | NA         | 0.020            | Ref.              |
| N1                          | 91       | 511       |                  | 1.82 (0.90-3.68) | 581        |                  | 3.74 (1.14-12.27) |
| Histological grade          |          |           |                  |                  |            |                  |                   |
| G1                          | 15       | 518       | 0.034            | Ref.             | 620        | 0.002            | Ref.              |
| G2                          | 65       | 603       |                  | 1.22 (0.54-2.76) | 831        |                  | 0.74 (0.27-2.03)  |
| G3/G4                       | 32       | 470       |                  | 2.27 (0.96-5.34) | 393        |                  | 2.74 (0.94-8.02)  |
| Radical resection           |          |           |                  |                  |            |                  |                   |
| No                          | 44       | 381       | 0.009            | Ref.             | 461        | 0.014            | Ref.              |
| Yes                         | 66       | 603       |                  | 0.51 (0.31-0.85) | 831        |                  | 0.40 (0.19-0.85)  |
| Radiation therapy           |          |           |                  |                  |            |                  |                   |
| No                          | 70       | 473       | 0.029            | Ref.             | 716        | 0.697            | Ref.              |
| Yes                         | 30       | 691       |                  | 0.53 (0.29-0.95) | 542        |                  | 1.15 (0.56-2.36)  |
| Targeted molecular therapy  |          |           |                  |                  |            |                  |                   |
| No                          | 29       | 224       | <0.001           | Ref.             | NA         | 0.470            | Ref.              |
| Yes                         | 73       | 634       |                  | 0.17 (0.10-0.30) | 593        |                  | 0.72 (0.29-1.78)  |

Alcohol addiction history information was unavailable for 8 patients, radical resection information was unavailable for 2 patients, radiation therapy information was unavailable for 12 patients and targeted molecular therapy information unavailable for 10 patients. MST, median survival time; MRT, median disease-free survival time; HR, hazard ratio; CI, confidence interval; Ref., reference; NA, not available.
